# Supplementary material for: A double-labeling marker-based method for estimating inbreeding and parental genomic components in a population under conservation
Source: PubMed Central journal article supplement (PMC6946976; doi:10.5713/ajas.19.0035), 2019-07-01

Figure S3

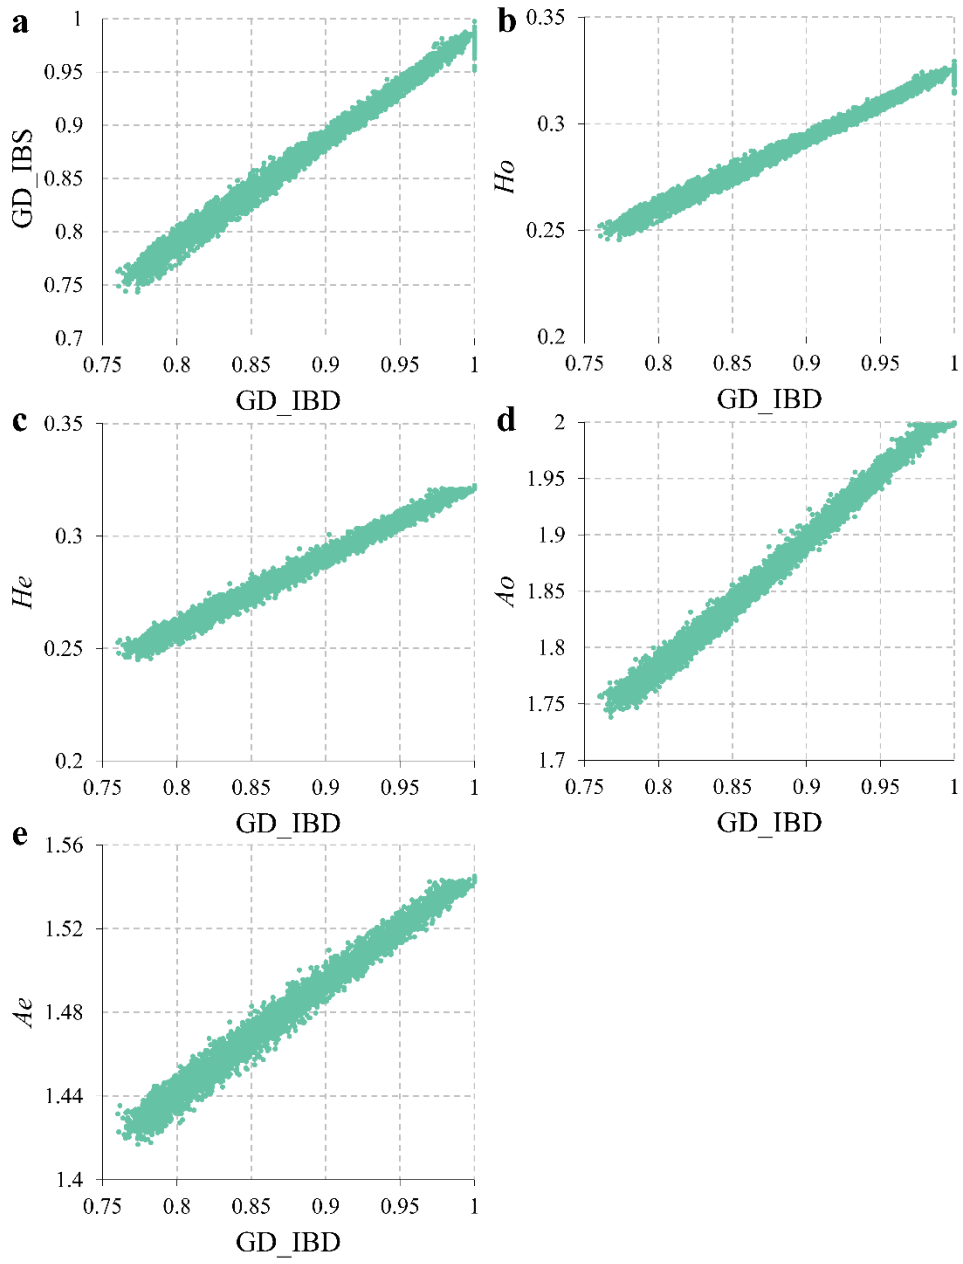

Supplement: ajas-19-0035-suppl3.pdf [file ajas-19-0035-suppl3.pdf]
