# Supplementary material for: A double-labeling marker-based method for estimating inbreeding and parental genomic components in a population under conservation
Source: PubMed Central journal article supplement (PMC6946976; doi:10.5713/ajas.19.0035), 2019-07-01
Supplement: ajas-19-0035-suppl4.pdf [file ajas-19-0035-suppl4.pdf]

Table S1 The temporal changes of genomic contents of each male family

| ID<br>$t$ | M1      | M2      | M3      | M4     | M5      | M6     | M7      | M8      | M9      | M10     | M11     | M12     | M13    | M14    | M15     | M16    | M17     | M18     | M19     | M20    |
|-----------|---------|---------|---------|--------|---------|--------|---------|---------|---------|---------|---------|---------|--------|--------|---------|--------|---------|---------|---------|--------|
| 1         | 0       | 0       | 0       | 0      | 0       | 0      | 0       | 0       | 0       | 0       | 0       | 0       | 0      | 0      | 0       | 0      | 0       | 0       | 0       | 0      |
| 2         | 0.0146  | -0.0636 | -0.0128 | 0.1764 | -0.0992 | 0.1459 | -0.1526 | -0.137  | -0.0339 | -0.0811 | 0.0788  | -0.1309 | 0.0355 | 0.071  | -0.0165 | 0.144  | -0.0212 | 0.0049  | -0.0828 | 0.0189 |
| 3         | 0.091   | -0.1996 | -0.1769 | 0.2619 | -0.1984 | 0.2854 | -0.3686 | -0.2993 | -0.4025 | -0.1864 | 0.2878  | -0.4075 | 0.2258 | 0.361  | 0.2434  | 0.6443 | 0.1604  | 0.0614  | -0.3292 | 0.2261 |
| 4         | -0.0526 | -0.1779 | -0.2644 | 0.4372 | -0.0648 | 0.1809 | -0.5272 | -0.0675 | -0.3991 | -0.1503 | 0.1471  | -0.5544 | 0.2423 | 0.2769 | 0.187   | 0.7258 | 0.523   | 0.1604  | -0.4388 | 0.1218 |
| 5         | -0.1701 | -0.1657 | -0.313  | 0.7388 | -0.236  | 0.1736 | -0.5228 | 0.0442  | -0.3432 | -0.1791 | 0.1073  | -0.5211 | 0.5373 | 0.1717 | 0.1436  | 0.749  | 0.5109  | 0.0607  | -0.547  | 0.1482 |
| 6         | -0.1599 | -0.1533 | -0.1239 | 0.8765 | -0.3216 | 0.261  | -0.5544 | 0.1254  | -0.2733 | -0.1093 | 0.0226  | -0.5812 | 0.5145 | 0.206  | 0.0786  | 0.6679 | 0.558   | -0.0198 | -0.5295 | 0.2093 |
| 7         | -0.0723 | -0.085  | -0.1057 | 0.7712 | -0.281  | 0.2457 | -0.555  | 0.0579  | -0.3069 | -0.1104 | 0.0558  | -0.592  | 0.562  | 0.2024 | 0.1039  | 0.567  | 0.5401  | 0.0134  | -0.4892 | 0.1995 |
| 8         | -0.1187 | -0.1194 | -0.1185 | 0.8536 | -0.3552 | 0.352  | -0.5274 | 0.0599  | -0.2991 | -0.1366 | 0.0134  | -0.5771 | 0.5196 | 0.2888 | 0.1502  | 0.5637 | 0.4582  | -0.0034 | -0.504  | 0.3022 |
| 9         | -0.0779 | -0.1942 | -0.1675 | 0.8862 | -0.3606 | 0.267  | -0.5136 | 0.0488  | -0.2612 | -0.125  | 0.0017  | -0.576  | 0.4571 | 0.3993 | 0.1103  | 0.5833 | 0.4233  | -0.0045 | -0.4442 | 0.3186 |
| 10        | 0.0048  | -0.2709 | -0.0833 | 0.9552 | -0.3544 | 0.255  | -0.5026 | 0.0668  | -0.2507 | -0.0931 | -0.0279 | -0.5961 | 0.4664 | 0.4549 | 0.1043  | 0.6128 | 0.4072  | 0.0006  | -0.4456 | 0.3627 |
| 11        | 0.0053  | -0.2368 | -0.0685 | 1.0037 | -0.3445 | 0.3515 | -0.5961 | 0.0654  | -0.231  | -0.1199 | -0.0388 | -0.5884 | 0.4877 | 0.4664 | 0.1127  | 0.5522 | 0.4189  | -0.0757 | -0.3552 | 0.3709 |
| 12        | 0.0694  | -0.2318 | -0.1821 | 0.9734 | -0.4215 | 0.3972 | -0.6326 | 0.0616  | -0.2383 | -0.0418 | -0.0125 | -0.5588 | 0.466  | 0.4401 | 0.0243  | 0.5886 | 0.4037  | -0.0563 | -0.4035 | 0.3574 |
| 13        | 0.0502  | -0.1925 | -0.2049 | 0.9714 | -0.4304 | 0.4756 | -0.6383 | 0.0678  | -0.213  | -0.0442 | -0.042  | -0.5597 | 0.4091 | 0.4491 | 0.0173  | 0.5645 | 0.3707  | -0.05   | -0.4173 | 0.3016 |
| 14        | 0.1018  | -0.2223 | -0.2147 | 1.0029 | -0.4181 | 0.5229 | -0.6127 | 0.0247  | -0.206  | 0.0103  | -0.1136 | -0.5436 | 0.3616 | 0.4336 | 0.0209  | 0.4851 | 0.397   | -0.06   | -0.4021 | 0.297  |
| 15        | 0.1113  | -0.2204 | -0.2203 | 1.0391 | -0.4232 | 0.4757 | -0.5947 | 0.0044  | -0.217  | 0.038   | -0.1405 | -0.5521 | 0.3577 | 0.4455 | 0.1045  | 0.4746 | 0.4296  | -0.0437 | -0.4517 | 0.2264 |
| 16        | 0.05    | -0.1928 | -0.1937 | 1.0583 | -0.3885 | 0.4656 | -0.6128 | 0.0023  | -0.2178 | 0.1276  | -0.1084 | -0.5669 | 0.3517 | 0.3886 | 0.1625  | 0.536  | 0.4536  | -0.0639 | -0.4724 | 0.2846 |
| 17        | 0.1114  | -0.2257 | -0.1949 | 1.1038 | -0.3338 | 0.4516 | -0.5883 | 0.005   | -0.2619 | 0.1214  | -0.1116 | -0.5653 | 0.3503 | 0.4185 | 0.1648  | 0.4952 | 0.4218  | -0.022  | -0.5241 | 0.2913 |
| 18        | 0.028   | -0.1976 | -0.1947 | 1.0223 | -0.3301 | 0.4682 | -0.5693 | 0.087   | -0.2652 | 0.1369  | -0.0702 | -0.588  | 0.3716 | 0.4465 | 0.1784  | 0.4702 | 0.4565  | -0.0475 | -0.5555 | 0.3367 |
| 19        | -0.0012 | -0.1919 | -0.2006 | 0.9911 | -0.3315 | 0.4292 | -0.5532 | 0.0715  | -0.238  | 0.1956  | -0.0777 | -0.5537 | 0.4269 | 0.3941 | 0.1606  | 0.4983 | 0.4732  | -0.034  | -0.5729 | 0.2983 |
| 20        | 0.0129  | -0.181  | -0.1988 | 0.9665 | -0.317  | 0.4709 | -0.5419 | 0.0868  | -0.2117 | 0.2583  | -0.0923 | -0.5564 | 0.4284 | 0.3543 | 0.1024  | 0.4724 | 0.4864  | -0.0377 | -0.5719 | 0.2799 |
| 21        | -0.0127 | -0.2113 | -0.1793 | 1.0338 | -0.3543 | 0.4406 | -0.542  | 0.1139  | -0.2588 | 0.2472  | -0.0879 | -0.5866 | 0.3928 | 0.423  | 0.1044  | 0.4482 | 0.5696  | -0.037  | -0.5698 | 0.2994 |
| 22        | -0.04   | -0.2095 | -0.1675 | 1.1104 | -0.3653 | 0.5109 | -0.5716 | 0.1264  | -0.2754 | 0.1733  | -0.089  | -0.5788 | 0.4107 | 0.398  | 0.0573  | 0.4605 | 0.5676  | -0.0639 | -0.5532 | 0.2965 |
| 23        | -0.0397 | -0.245  | -0.1685 | 1.1933 | -0.3964 | 0.5011 | -0.5949 | 0.1421  | -0.2554 | 0.1649  | -0.0691 | -0.5717 | 0.4427 | 0.4381 | 0.0465  | 0.4453 | 0.6328  | -0.069  | -0.5787 | 0.2917 |
| 24        | -0.0534 | -0.2374 | -0.1535 | 1.1717 | -0.3884 | 0.4689 | -0.6202 | 0.1325  | -0.2621 | 0.152   | -0.0638 | -0.581  | 0.4364 | 0.4749 | 0.0596  | 0.4211 | 0.6075  | -0.0788 | -0.5849 | 0.2923 |
| 25        | -0.1146 | -0.2185 | -0.193  | 1.2081 | -0.3486 | 0.4461 | -0.6521 | 0.1754  | -0.2483 | 0.1195  | -0.1093 | -0.5655 | 0.4142 | 0.4898 | 0.0312  | 0.4433 | 0.6614  | -0.1064 | -0.5565 | 0.3197 |
| 26        | -0.1226 | -0.2414 | -0.1857 | 1.2118 | -0.3284 | 0.4544 | -0.6504 | 0.1211  | -0.2575 | 0.148   | -0.1278 | -0.5845 | 0.4134 | 0.4359 | 0.0433  | 0.3972 | 0.647   | -0.0567 | -0.5484 | 0.343  |
| 27        | -0.0987 | -0.2419 | -0.206  | 1.1804 | -0.3371 | 0.3992 | -0.6672 | 0.1199  | -0.2837 | 0.127   | -0.1009 | -0.6028 | 0.4031 | 0.4725 | 0.0398  | 0.4243 | 0.6025  | -0.0204 | -0.5166 | 0.3637 |
| 28        | -0.1081 | -0.246  | -0.2492 | 1.2054 | -0.315  | 0.3704 | -0.6708 | 0.1007  | -0.3027 | 0.0981  | -0.0926 | -0.5761 | 0.4116 | 0.4751 | 0.0446  | 0.4345 | 0.5289  | -0.024  | -0.5115 | 0.3889 |
| 29        | -0.12   | -0.2298 | -0.252  | 1.1534 | -0.2998 | 0.3366 | -0.6759 | 0.1198  | -0.3133 | 0.0537  | -0.1018 | -0.5989 | 0.4194 | 0.4792 | 0.0804  | 0.4641 | 0.5187  | -0.0275 | -0.5169 | 0.3981 |
| 30        | -0.1123 | -0.2853 | -0.2772 | 1.1589 | -0.2765 | 0.353  | -0.6939 | 0.1296  | -0.3208 | 0.062   | -0.1088 | -0.5987 | 0.4408 | 0.4787 | 0.0999  | 0.4538 | 0.4883  | -0.0111 | -0.4993 | 0.431  |
| 31        | -0.0952 | -0.2876 | -0.2884 | 1.1898 | -0.3074 | 0.3413 | -0.6862 | 0.0601  | -0.31   | 0.0576  | -0.1179 | -0.6021 | 0.4578 | 0.4905 | 0.1476  | 0.4141 | 0.4772  | 0.0242  | -0.4918 | 0.4237 |

|    |         |         |         |        |         |        |         |         |         |        |         |         |        |        |        |        |        |         |         |        |
|----|---------|---------|---------|--------|---------|--------|---------|---------|---------|--------|---------|---------|--------|--------|--------|--------|--------|---------|---------|--------|
| 32 | -0.112  | -0.3018 | -0.3315 | 1.1589 | -0.2848 | 0.3551 | -0.6767 | 0.0788  | -0.3286 | 0.0944 | -0.1151 | -0.6098 | 0.4889 | 0.4675 | 0.1328 | 0.3887 | 0.476  | 0.0203  | -0.4809 | 0.4162 |
| 33 | -0.1295 | -0.2929 | -0.3506 | 1.1552 | -0.2603 | 0.3839 | -0.6679 | 0.0883  | -0.3534 | 0.1235 | -0.1145 | -0.6349 | 0.471  | 0.4432 | 0.0874 | 0.3299 | 0.4943 | 0.0123  | -0.4617 | 0.4382 |
| 34 | -0.1154 | -0.3116 | -0.3187 | 1.1841 | -0.286  | 0.3634 | -0.6579 | 0.0927  | -0.3776 | 0.155  | -0.0897 | -0.6195 | 0.4271 | 0.4237 | 0.101  | 0.2694 | 0.5194 | -0.0243 | -0.4648 | 0.4448 |
| 35 | -0.1007 | -0.3078 | -0.3574 | 1.238  | -0.313  | 0.3398 | -0.6585 | 0.0813  | -0.3903 | 0.1674 | -0.1242 | -0.6168 | 0.3924 | 0.4291 | 0.1244 | 0.2601 | 0.51   | -0.019  | -0.4709 | 0.4454 |
| 36 | -0.1414 | -0.2959 | -0.3429 | 1.2305 | -0.3325 | 0.3823 | -0.649  | 0.039   | -0.3707 | 0.1811 | -0.1036 | -0.6235 | 0.3605 | 0.4741 | 0.1561 | 0.2781 | 0.5317 | -0.0215 | -0.4676 | 0.4401 |
| 37 | -0.1424 | -0.3291 | -0.3452 | 1.1944 | -0.3164 | 0.3838 | -0.6406 | 0.0939  | -0.3729 | 0.1955 | -0.1264 | -0.617  | 0.3286 | 0.4299 | 0.1686 | 0.3314 | 0.5526 | -0.0404 | -0.4717 | 0.445  |
| 38 | -0.1143 | -0.328  | -0.3417 | 1.2307 | -0.3069 | 0.4157 | -0.6374 | 0.0594  | -0.3392 | 0.2179 | -0.1321 | -0.5957 | 0.3583 | 0.4501 | 0.1943 | 0.2561 | 0.5561 | -0.0674 | -0.4741 | 0.4743 |
| 39 | -0.0916 | -0.3229 | -0.3492 | 1.1667 | -0.3118 | 0.4291 | -0.6503 | 0.0527  | -0.3387 | 0.2599 | -0.1526 | -0.6006 | 0.3501 | 0.4485 | 0.1813 | 0.2495 | 0.5887 | -0.0561 | -0.4611 | 0.4844 |
| 40 | -0.1006 | -0.3218 | -0.3464 | 1.1726 | -0.3492 | 0.4343 | -0.6623 | 0.0489  | -0.3627 | 0.2837 | -0.1641 | -0.5657 | 0.3526 | 0.4621 | 0.1641 | 0.2476 | 0.6066 | -0.0322 | -0.4571 | 0.457  |
| 41 | -0.0973 | -0.3002 | -0.3414 | 1.1835 | -0.3781 | 0.4278 | -0.6896 | 0.0637  | -0.369  | 0.2928 | -0.1752 | -0.568  | 0.3717 | 0.4557 | 0.1794 | 0.2563 | 0.6065 | -0.0174 | -0.4346 | 0.4381 |
| 42 | -0.0546 | -0.3097 | -0.3269 | 1.1993 | -0.3615 | 0.4491 | -0.7087 | 0.0665  | -0.371  | 0.2964 | -0.1654 | -0.5791 | 0.3689 | 0.4448 | 0.1619 | 0.2742 | 0.6083 | -0.0419 | -0.4424 | 0.4184 |
| 43 | -0.0935 | -0.3173 | -0.3358 | 1.2047 | -0.3501 | 0.4713 | -0.6996 | 0.0864  | -0.364  | 0.2887 | -0.1573 | -0.5743 | 0.3446 | 0.47   | 0.1783 | 0.2968 | 0.5901 | -0.0584 | -0.454  | 0.4067 |
| 44 | -0.0997 | -0.3024 | -0.3259 | 1.1839 | -0.3553 | 0.4738 | -0.7042 | 0.064   | -0.3749 | 0.3346 | -0.1481 | -0.5924 | 0.3388 | 0.4568 | 0.1935 | 0.3052 | 0.5774 | -0.054  | -0.4285 | 0.3787 |
| 45 | -0.1326 | -0.2872 | -0.3471 | 1.2019 | -0.3405 | 0.4747 | -0.6922 | 0.0353  | -0.3402 | 0.3437 | -0.1604 | -0.5889 | 0.3225 | 0.458  | 0.1671 | 0.2954 | 0.5334 | -0.0543 | -0.4148 | 0.401  |
| 46 | -0.1198 | -0.2821 | -0.3718 | 1.1901 | -0.3483 | 0.4762 | -0.6934 | 0.0044  | -0.3504 | 0.373  | -0.1515 | -0.5879 | 0.3532 | 0.4535 | 0.1326 | 0.3201 | 0.5334 | -0.0815 | -0.4156 | 0.4508 |
| 47 | -0.0828 | -0.294  | -0.3975 | 1.1922 | -0.3591 | 0.4538 | -0.6888 | -0.0002 | -0.353  | 0.3716 | -0.1381 | -0.6065 | 0.3258 | 0.4685 | 0.1034 | 0.318  | 0.5533 | -0.0771 | -0.4306 | 0.4848 |
| 48 | -0.1095 | -0.2885 | -0.4212 | 1.2164 | -0.3686 | 0.4398 | -0.697  | -0.002  | -0.3659 | 0.408  | -0.1356 | -0.6056 | 0.2876 | 0.4468 | 0.0968 | 0.3137 | 0.5763 | -0.0831 | -0.4269 | 0.4933 |
| 49 | -0.0989 | -0.2875 | -0.4527 | 1.2323 | -0.3791 | 0.436  | -0.7202 | 0.0016  | -0.3673 | 0.4842 | -0.1468 | -0.6088 | 0.2915 | 0.4792 | 0.1    | 0.3237 | 0.5858 | -0.0831 | -0.4341 | 0.5214 |
| 50 | -0.0844 | -0.3016 | -0.4546 | 1.2268 | -0.4108 | 0.4234 | -0.718  | 0.0003  | -0.3673 | 0.49   | -0.1782 | -0.6058 | 0.2997 | 0.484  | 0.1206 | 0.2906 | 0.5674 | -0.0699 | -0.4488 | 0.5296 |
