# Supplementary material for: A double-labeling marker-based method for estimating inbreeding and parental genomic components in a population under conservation
Source: PubMed Central journal article supplement (PMC6946976; doi:10.5713/ajas.19.0035), 2019-07-01
Supplement: ajas-19-0035-suppl5.pdf [file ajas-19-0035-suppl5.pdf]

## Fortran Source Code

```
##aa_ana.for

subroutine aa_ana

implicit none

common/resultaa01/fmaa
common/resultaa02/ffaa

common /popmaa/snpmaa
common /popfaa/snpfaa

! this block is connected with main and r02 block

integer,parameter::nc=19      !number of chromosomes
integer,parameter::nl=1000   !number of marker
integer,parameter::nmale=20 !number of male
integer,parameter::nfemale=100 !number of female

integer,dimension(nmale,nc,2,nl)::snpmaa
integer,dimension(nfemale,nc,2,nl)::snpfaa

integer,dimension(nc,nl,2,nmale)::maanl
integer,dimension(nc,nl,2,nfemale)::faanl

integer,dimension(nl,2,nmale)::inmaa
integer,dimension(nl,2,nfemale)::infaa

integer,dimension(nmale)::maa      !aa porpotion
integer,dimension(nfemale)::faa

real,dimension(nmale)::fmaa      !aa porpotion
real,dimension(nfemale)::ffaa

integer code,code2,temp
integer i,ii,iii,j

real templ

!+++++transfer block ++++++

do iii=1,nc
  do ii=1,nl
    do i=1,2
      do j=1,nmale
        code2=snpmaa(j,iii,i,ii)
        maanl(iii,ii,i,j)=code2
      end do
    end do
  end do
  do ii=1,nl
    do i=1,2
      do j=1,nfemale
        code2=snpfaa(j,iii,i,ii)
        faanl(iii,ii,i,j)=code2
      end do
    end do
  end do
end do
```

!----- the calculation block -----

maa=0;faa=0

do iii=1,nc ! number of chromosome

do ii=1,nl !number of SNP each chromosome

do i=1,2

do j=1,nmale

inmaa(ii,i,j)=maanl(iii,ii,i,j)

end do

end do

end do

do ii=1,nl

do i=1,2

do j=1,nfemale

infaa(ii,i,j)=faanl(iii,ii,i,j)

end do

end do

end do !end of nl cycle

!+++++  
!+++++

do ii=1,nl

do i=1,2

do j= 1,nmale

code=inmaa(ii,i,j)

if(code<=nmale)then

temp=maa(code)

temp=temp+1

maa(code)=temp

else

code2=code-100

temp=faa(code2)

temp=temp+1

faa(code2)=temp

end if

end do ! end of male

do j= 1,nfemale

code=infaa(ii,i,j)

if(code<=nmale)then

temp=maa(code)

temp=temp+1

maa(code)=temp

else

code2=code-100

temp=faa(code2)

temp=temp+1

faa(code2)=temp

end if

end do !end of female

end do !end of i cycle

end do !end of a given chromosome

end do !end of a set of chromosome

!-----

do i=1,nmale

temp=maa(i)

```

    temp1=float(temp)/float(nc*nl*6)-1.0
    fmaa(i)=temp1
end do
do i=1,nfemale
    temp=faa(i)
    temp1=float(temp)/(float(nc*nl)+float(nc*nl)/5.0)-1.0
    ffaa(i)=temp1
end do

```

```

end subroutine aa_ana

```

```

##aa_mark.for

```

```

subroutine aa_mark

```

```

implicit none

```

```

common /popmaa/snpmaa
common /popfaa/snpfaa

```

```

integer,parameter::nc=19      !number of chromosomes
integer,parameter::nl=1000    !number of marker
integer,parameter::nmale=20 !number of male
integer,parameter::nfemale=100 !number of female

```

```

integer,dimension(nmale,nc,2,nl)::snpmaa
integer,dimension(nfemale,nc,2,nl)::snpfaa

```

```

integer i,ii,iii,j

```

```

!-----ancesotr code for base poulation -----

```

```

snpmaa=0
snpfaa=0

```

```

do j=1,nmale
    do iii=1,nc
        do ii=1,2
            do i=1,nl
                snpmaa(j,iii,ii,i)=j
            end do
        end do
    end do
end do

```

```

do j=1,nfemale
    do iii=1,nc
        do ii=1,2
            do i=1,nl
                snpfaa(j,iii,ii,i)=j+100
            end do
        end do
    end do
end do

```

```

end subroutine aa_mark

```

```

##aa_num.for

```

```

subroutine aa_num(code)

```

```

implicit none

```

```

integer code

```

```

select case(code)
  case(1)
    k1=k1+1
  case(2)
    k2=k2+1
  case(3)
    k3=k3+1
  case(4)
    k4=k4+1
  case(5)
    k5=k5+1
  case(6)
    k6=k6+1
  case(7)
    k7=k7+1
  case(8)
    k8=k8+1
  case(9)
    k9=k9+1
  case(10)
    k10=k10+1
  case(11)
    k11=k11+1
  case(12)
    k12=k12+1

```

```

end select

```

```

##ancestor.for

```

```

subroutine ancestor

```

```

  implicit none

```

```

  common /codmale01/codmchange
  common /codpfemale01/codfchange

```

```

  common/an01/comam
  common/an02/comaf ! form main block

```

```

integer,parameter::nc=19 !number of chromosomes
integer,parameter::nl=1000 !number of marker
integer,parameter::nmale=10 !number of male
integer,parameter::nfemale=50 !number of female
integer,dimension(nmale,nc,2,nl)::codmchange
integer,dimension(nfemale,nc,2,nl)::codfchange

```

```

! this is for calculation based on SNP loci

```

```

integer,dimension(nmale)::comam
integer,dimension(nfemale)::comaf
integer,dimension(nl)::cham !common ancestor for given chromosome
integer,dimension(nl)::chaf

```

```

integer,dimension(nc,2,nl)::inam !common ancestor for given individual
integer,dimension(nc,2,nl)::inaf
integer,dimension(nmale,nc,nmale)::popam !common a for pop
integer,dimension(nfemale,nc,nfemale)::popaf

```

```
integer temp, code ! inter-variable
integer i,ii,iii,j
integer il,icom
```

```
!----- the calculation block for ancestor comparpent -----
```

```
popam=0; popaf=0
```

```
do j=1,nmale !
  inam=0;inaf=0
  do iii=1,nc ! number of chromosome
    cham=0; chaf=0
  do ii=1,2
    do i=1,nl
```

```
      temp=codmchange(j,iii,ii,i)
```

```
      if(temp<100) then
```

```
        do il=1,nmale
```

```
          code=comam(il)
```

```
          icom=il
```

```
          if(temp==code) exit
```

```
        end do
```

```
        cham(icom)=cham(icom)+1
```

```
      else
```

```
        do il=1,nfemale
```

```
          code=comaf(il)
```

```
          icom=il
```

```
          if(temp==code) exit
```

```
        end do
```

```
        chaf(icom)=chaf(icom)+1
```

```
      end if
```

```
    end do
```

```
  end do
```

```
    inam(iii,1:nmale)=cham
```

```
    inaf(iii,1:nfemale)=chaf
```

```
  end do
```

```
    popam(j,1:nc,1:nmale)=inam
```

```
    popaf(j,1:nc,1:nfemale)=inaf
```

```
  end do
```

```
! the block of calculation the ancestor frequency
```

```
end subroutine ancestor
```

```
##normal_distribution02.for
```

```
subroutine normal_distribution02
```

```
implicit none
```

```
common /comseed/seed
```

```
common /mutation02/number_mutation !connected with mutation block
```

```
real,parameter::pi=3.14
```

```
real,parameter::u=2.5e-6 ! mutation rate
```

```
integer,parameter::nc=19 !number of chromosomes
```

```
integer,parameter::nl=1000 !number of marker
```

```
integer,parameter::nmale=20 !number of male
```

```
integer,parameter::nfemale=100 !number of female
```

```
integer number_mutation
```

```
real r,r1,r2,y1,y2
```

```
real a,c,lambda
```

```
integer,dimension(1):: seed  
integer i
```

```
!number of mutation per chromosome per generation
```

```
call random_seed(put=seed)
```

```
i=-1;a=3  
lambda=2*(nmale+nfemale)*nc*u*nl
```

```
do while(i<0)  
  call random_number(r)  
  r1=r  
  call random_number(r)  
  r2=r  
  call random_number(r)  
  y1=2*a*r1-a  
  call random_number(r)  
  y2=(1/sqrt(pi))*r2  
  c=(1/sqrt(2*pi))*exp(-y1**2/2)  
  if(y2<=c) i=1  
end do
```

```
y2=lambda+sqrt(lambda)*y2  
number_mutation=int(y2)
```

```
call random_seed(get=seed)
```

```
end subroutine normal_distribution02
```

```
##poisson_process.for
```

```
subroutine poisson_process
```

```
implicit none
```

```
common /comseed/seed  
common/cross/crossover !connected with reproduction block
```

```
real,parameter::lambda=1.0  
integer,parameter::nc=19
```

```
integer,dimension(1):: seed  
integer,dimension(nc)::crossover
```

```
integer ii,i,x  
real m,r
```

```
call random_seed(put=seed)
```

```
do ii=1,nc
```

```
  i=-1; x=-1  
  m=exp(lambda)
```

```
  do while(i<0)
```

```
    call random_number(r)  
    m=m*r  
    x=x+1  
    if(m<1.0) i=1  
  end do
```

```

        crossover(ii)=x
    end do

    call random_seed(get=seed)

end subroutine poisson_process

##random_mating2011.for
subroutine random_mating2011

implicit none

common /commonseed/seed
common /femalerandom/female_num
common /malerandom/male_num

integer,parameter:: malepop=20,femalepop=100

integer,dimension(femalepop)::female_num
integer,dimension(malepop)::male_num

integer i
integer k,num
real r

integer,dimension(1):: seed

    call random_seed(put=seed)

    female_num=0;male_num=0

    k=0
    do while(k<=femalepop)

        call random_number(r)
        num=int(r*femalepop+1)
        do i=1,femalepop
            if(num==female_num(i)) exit
        end do

        if(i>=femalepop) then
            k=k+1
            female_num(k)=num
        end if
    end do

    k=0
    do while(k<=malepop)
        call random_number(r)
        num=int(r*malepop+1)
        do i=1,malepop
            if(num==male_num(i)) exit
        end do

        if(i>=malepop) then
            k=k+1
            male_num(k)=num
        end if
    end do

    call random_seed(get=seed)

```

```
end subroutine random_mating2011
```

```
##snp_ana.for
```

```
subroutine snp_ana
```

```
implicit none
```

```
common /resultaa/aa
```

```
common/rnsnp_ana01/k1,k2,k3,k4,k5,k6,k7,k8,k9,k10,ko,kf
```

```
integer,parameter::nc=19 !number of chromosomes
```

```
integer,parameter::nl=1000 !number of marker
```

```
real,dimension(nc,nl,2)::aa
```

```
integer k1,k2,k3,k4,k5
```

```
integer k6,k7,k8,k9,k10
```

```
integer ko,kf
```

```
real temp
```

```
integer i,ii
```

```
!+++++++snp frequency distribution ++++++++
```

```
k1=0; k2=0; k3=0; k4=0; k5=0
```

```
k6=0; k7=0; k8=0; k9=0; k10=0
```

```
ko=0; kf=0
```

```
do ii=1,nc
```

```
do i=1,nl
```

```
temp=aa(ii,i,1)
```

```
if(0<=temp .and. temp <0.1) then
```

```
k1=k1+1
```

```
else if(0.1<=temp .and. temp <0.2) then
```

```
k2=k2+1
```

```
else if(0.2<=temp .and. temp <0.3) then
```

```
k3=k3+1
```

```
else if(0.3<=temp .and. temp <0.4) then
```

```
k4=k4+1
```

```
else if(0.4<=temp .and. temp <0.5) then
```

```
k5=k5+1
```

```
else if(0.5<=temp .and. temp <0.6) then
```

```
k6=k6+1
```

```
else if(0.6<=temp .and. temp <0.7) then
```

```
k7=k7+1
```

```
else if(0.7<=temp .and. temp <0.8) then
```

```
k8=k8+1
```

```
else if(0.8<=temp .and. temp <0.9) then
```

```
k9=k9+1
```

```
else if(0.9<=temp .and. temp <=1.0) then
```

```
k10=k10+1
```

```
end if
```

```
if(temp<=0.0001) then
```

```
ko=ko+1
```

```
else if(temp>=0.9999) then
```

```
kf=kf+1
```



```

    end if

end do
end do

end subroutine snp_ana

##snp_count.for
subroutine snp_count

implicit none

common /resultaa/aa ! connected with calculation subroutine

common/resultcount01/gho,ga_rich
common/resultcount02/ncho
common/resultcount03/nca_rich

common /popmale/ snpmale
common /popfemale/ snpfemale

integer,parameter::nc=19      !number of chromosomes
integer,parameter::nl=1000    !number of marker
integer,parameter::nmale=20  !number of male
integer,parameter::nfemale=100 !number of female
integer,dimension(nmale,nc,2,nl)::snpmale
integer,dimension(nfemale,nc,2,nl)::snpfemale
integer,dimension(nc,nl,2,nmale)::snpmnl
integer,dimension(nc,nl,2,nfemale)::snpfnl
! this is for calculation based on SNP loci

real,dimension(nc,nl,2)::aa      ! genic frequency for gonomic snp loci
real,dimension(2)::fre_allele    ! allelic frequency for a given loci

integer,dimension(nl,2,nmale)::indim
integer,dimension(nl,2,nfemale)::indif

real,dimension(nc)::ncho,nca_rich
real ga_rich      ! allelic number
real gho          ! gonomic ho

integer kk1,kk2 ! heterozygosity or homozygosity

integer nchomo,nheter
! homozygosity and heterozygosity for a given chromosome
integer ghomo,gheter ! gonomic homozygosity and heterozygosity

real h

integer code,gnum,ncnum ! inter-variable
real tempfre,tempa

integer i,ii,iii,j

!+++++transfer block ++++++

do iii=1,nc

do ii=1,nl
do i=1,2
do j=1,nmale

```

```

        code=snpmale(j,iii,i,ii)
        snpmnl(iii,ii,i,j)=code
    end do
end do
end do
do ii=1,nl
do i=1,2
do j=1,nfemale
    code=snpfemale(j,iii,i,ii)
    snpfnl(iii,ii,i,j)=code
end do
end do
end do
end do ! the end of transfer block

```

!----- the calculation block -----

!+++++

```

ghomo=0; gheter=0; gnum=0
!gnum is number of genomic snp

```

```

do iii=1,nc ! number of chromosome
    nchomo=0;ncheter=0;ncnum=0

```

```

do ii=1,nl
do i=1,2
do j=1,nmale
    indim(ii,i,j)=snpmnl(iii,ii,i,j)
end do
end do
end do

```

```

do ii=1,nl
do i=1,2
do j=1,nfemale
    indif(ii,i,j)=snpfnl(iii,ii,i,j)
end do
end do
end do

```

! the block of calculate the allele frequency

```

do ii=1,nl ! cycle of nl

```

```

do i=1,2
    tempfre=aa(iii,ii,i)
    fre_allele(i)=tempfre

    if(tempfre>0.001) then
        gnum=gnum+1
        ncnum=ncnum+1
    end if
end do
end do

```

! \_\_\_ count the homozygosity and heterozygosity \_\_\_\_\_

```

do j= 1,nmale
    kk1=indim(ii,1,j)
    kk2=indim(ii,2,j)

    if(kk1==kk2) then
        ghomo=ghomo+1
        nchomo=nchomo+1
    end if
end do

```

```

else
  gheter=gheter+1
  ncheter=ncheter+1
end if
end do
!+++++
do j= 1,nfemale
  kk1=indif(ii,1,j)
  kk2=indif(ii,2,j)

  if(kk1==kk2) then
    ghomo=ghomo+1
    nchomo=nchomo+1
  else
    gheter=gheter+1
    ncheter=ncheter+1
  end if
end do

end do !end of nl cycle

h=float(ncheter)/float(ncheter+nchomo)
ncho(iii)=h
tempa=float(ncnum)/float(nl)
nca_rich(iii)=tempa

end do !end of nc cyclue (chromosome)

gho=float(gheter)/float(gheter+ghomo)
ga_rich=float(gnum)/float(nl*nc)

end subroutine snp_count

##snp_diversity.for
subroutine snp_diversity

implicit none

common /resultaa/aa
common/resultdiv2/mean_He,mean_allele,mean_ae,mean_p,num_p
common/resultdiv21/num_rare1,num_rare2

integer,parameter::nc=19      !number of chromosomes
integer,parameter::nl=1000   !number of marker

real,dimension(nc,nl,2)::aa
real,dimension(2)::freq_allele
integer,dimension(nc,nl)::num_allele !allelic number
real ,dimension(nc,nl)::Ae,He,p      ! P is portion of polymorphic loci
real mean_allele,mean_He,mean_ae,mean_p,num_p
!num_p is snp locci

integer ii,i,j

integer numtemp,ni
real temp,temp2
real tempae,tempHe,temppp

integer num_rare1,num_rare2
integer temp_rare1,temp_rare2

```

!----- the start of calculation -----

```
ni=0; tempHe=0; temp2=0; temp=0
num_allele=0;ae=0;he=0;p=0
num_rare1=0;num_rare2=0

do ii=1,nc
do i=1,nl
  numtemp=0; tempae=0
  temp_rare1=0;temp_rare2=0

do j=1,2
  freq_allele(j)=aa(ii,i,j)
  temp=freq_allele(j)

  tempae=tempae+temp*temp ! effective allelic rich

  if(temp>=0.001) then
    numtemp=numtemp+1      ! allelic number
  end if

  if(0.001<=temp.and.temp<0.02) then
    temp_rare1=temp_rare1+1 ! rare allele
  end if

  if(0.001<=temp.and.temp<0.05) then
    temp_rare2=temp_rare2+1
  end if
end do ! end of j cycle

  num_allele(ii,i)=numtemp      ! allelic number of given loci
  Ae(ii,i)=1.0/tempae
  He(ii,i)=1-tempae
  ni=ni+numtemp                ! total allelic number of genomics

  tempHe=tempHe+(1-tempae)
  temp2=temp2+1.0/tempae
  num_rare1=num_rare1+temp_rare1
  num_rare2=num_rare2+temp_rare2

  if (numtemp>1) then
    p(ii,i)=1
    temp=tempp+1
  else
    p(ii,i)=0
  end if

end do ! end of cycle snp loci in a given chromosome

end do

mean_allele=float(ni)/float(nc*nl) !ni is genomic allelic number
mean_He=tempHe/float(nc*nl)      !tempHe is genomic he
mean_ae=temp2/float(nc*nl)      !temp2 is genomic ae
mean_p=tempp/float(nc*nl)       !temp is genomic pp
num_p=tempp                      !num_p is genomic np
```

!-----

end subroutine snp\_diversity

##snp\_ibd.for

```
subroutine snp_ibd
```

```
implicit none
```

```
common/resultibd01/ngibd,ngibs  
common/resultibd02/ncibd  
common/resultibd03/ncibs
```

```
common /popmale/snpmale  
common /popfemale/snpfemale  
common /popmaa/snpmaa  
common /popfaa/snpfaa
```

```
! this block is connected with main and r02 block
```

```
integer,parameter::nc=19      !number of chromosomes  
integer,parameter::nl=1000    !number of marker  
integer,parameter::nmale=20  !number of male  
integer,parameter::nfemale=100 !number of female  
integer,dimension(nmale,nc,2,nl)::snpmale  
integer,dimension(nfemale,nc,2,nl)::snpfemale  
integer,dimension(nmale,nc,2,nl)::snpmaa  
integer,dimension(nfemale,nc,2,nl)::snpfaa
```

```
integer,dimension(nc,nl,2,nmale)::snpmnl  
integer,dimension(nc,nl,2,nfemale)::snpfnl  
integer,dimension(nc,nl,2,nmale)::maanl  
integer,dimension(nc,nl,2,nfemale)::faanl  
! this is for calculation based on SNP loci
```

```
integer,dimension(nl,2,nmale)::indim,inmaa  
integer,dimension(nl,2,nfemale)::indif,infaa
```

```
real,dimension(nc)::ncibd,ncibs  
real ngibd,ngibs
```

```
integer kk1,kk2    ! heterozygosity or homozygosity  
integer kkc1,kkc2 ! common code
```

```
integer ng_homo,ng_heter  
integer nc_homo,nc_heter  
integer ncnun_ibd,ngnum_ibd
```

```
integer code,code2  
integer i,ii,iii,j  
real h1,h2
```

```
!+++++transfer block ++++++
```

```
do iii=1,nc  
  do ii=1,nl  
    do i=1,2  
      do j=1,nmale  
        code=snpmale(j,iii,i,ii)  
        snpmnl(iii,ii,i,j)=code  
  
        code2=snpmaa(j,iii,i,ii)  
        maanl(iii,ii,i,j)=code2  
      end do  
    end do  
  end do  
do ii=1,nl
```

```

do i=1,2
do j=1,nfemale
  code=snpfemale(j,iii,i,ii)
  snpfnl(iii,ii,i,j)=code

  code2=snpfaa(j,iii,i,ii)
  faanl(iii,ii,i,j)=code2
end do
end do
end do
end do
!-----
!----- the calculation block -----
!-----
ng_homo=0;ng_heter=0
ngnum_ibd=0

do iii=1,nc ! number of chromosome
nc_homo=0;nc_heter=0
ncnum_ibd=0

do ii=1,nl !number of SNP each chromosome
do i=1,2
do j=1,nmale
  indim(ii,i,j)=snpmnl(iii,ii,i,j)
  inmaa(ii,i,j)=maanl(iii,ii,i,j)
end do
end do

do i=1,2
do j=1,nfemale
  indif(ii,i,j)=snpfnl(iii,ii,i,j)
  infaa(ii,i,j)=faanl(iii,ii,i,j)
end do
end do
end do
! the above block is in individual unit for SNP
!+++++
! the follow block is count for ibd

do ii=1,nl
do i=1,2

do j= 1,nmale
  kk1=indim(ii,1,j)
  kk2=indim(ii,2,j)
  kkc1=inmaa(ii,1,j)
  kkc2=inmaa(ii,2,j)

  if(kk1==kk2) then
    nc_homo=nc_homo+1
    ng_homo=ng_homo+1
  else
    nc_heter=nc_heter+1
    ng_heter=ng_heter+1
  end if

  if(kk1==kk2.and.kkc1==kkc2) then
    ncnum_ibd=ncnum_ibd+1
    ngnum_ibd=ngnum_ibd+1
  end if
end do
end do
!+++++

```

```

do j= 1,nfemale
  kk1=indif(ii,1,j)
  kk2=indif(ii,2,j)
  kkc1=infaa(ii,1,j)
  kkc2=infaa(ii,2,j)

  if(kk1==kk2) then
    nc_homo=nc_homo+1
    ng_homo=ng_homo+1
  else
    nc_heter=nc_heter+1
    ng_heter=ng_heter+1
  end if

  if(kk1==kk2.and.kkc1==kkc2) then
    ncnum_ibd=ncnum_ibd+1
    ngnum_ibd=ngnum_ibd+1
  end if

end do ! end of female

end do ! end of a snp locus(i cycle)
end do !end of a chromosome

h1=float(nc_homo)/float(nc_heter+nc_homo)
ncibs(iii)=h1
h2=float(ncnum_ibd)/float(nc_heter+nc_homo)
ncibd(iii)=h2
end do !end of cycle chromosome

h1=float(ng_heter)/float(ng_heter+ng_homo)
ngibs=h1
h2=float(ngnum_ibd)/float(ng_heter+ng_homo)
ngibd=h2

end subroutine snp_ibd

##snp_input.for
subroutine snp_input

  implicit none

  common /popmale/snpmale
  common /popfemale/snpfemale

  integer,parameter::nc=19      !number of chromosomes
  integer,parameter::nl=1000    !number of marker
  integer,parameter::nmale=20 !number of male
  integer,parameter::nfemale=100 !number of female
  integer,parameter::nloci=2*nc*nl

  integer,dimension(nmale,nc,2,nl)::snpmale
  integer,dimension(nfemale,nc,2,nl)::snpfemale

  integer,dimension(nc,nl,2,nmale)::snpmnl
  integer,dimension(nc,nl,2,nfemale)::snpfnl

  ! this is for calculation based on SNP loci

  integer,dimension(nloci,nmale)::locim
  integer,dimension(nloci,nfemale)::locif

  integer code,itemp

```

```

integer i,ii,iii
integer j,jj

open(1,file='f:\database\mnlsnp.txt')
open(2,file='f:\database\fnlsnp.txt')

read(1,*) ((locim(j,jj),jj=1,nmale),j=1,nloci)
read(2,*) ((locif(j,jj),jj=1,nfemale),j=1,nloci)
close(1);close(2)
! the block is read snp_data ++++++
itemp=1
do iii=1,nc
do ii=1,nl
do i=1,2
do j=1,nmale
code=locim(itemp,j)
snpmnl(iii,ii,i,j)=code
end do
itemp=itemp+1
end do
end do
end do

itemp=1
do iii=1,nc
do ii=1,nl
do i=1,2
do j=1,nfemale
code=locim(itemp,j)
snpfnl(iii,ii,i,j)=code
end do
itemp=itemp+1
end do
end do
end do
! the snp_data transfer to snpmnl and snpfnl
!+++++
do iii=1,nc
do ii=1,nl
do i=1,2
do j=1,nmale
code= snpmnl(iii,ii,i,j)
snpmale(j,iii,i,ii)=code
end do
end do
end do
end do

do iii=1,nc
do ii=1,nl
do i=1,2
do j=1,nfemale
code= snpfnl(iii,ii,i,j)
snpfemale(j,iii,i,ii)=code
end do
end do
end do
end do

!#####
end subroutine snp_input

```



```

## snp_m02.for
  subroutine snp_m02
! mutation subroutine

  implicit none

  common /comseed/seed

  common /popmale/snpmale
  common /popfemale/snpfemale

  common /mutation02/number_mutation !connected with mutation block

  integer,parameter::nc=19      !number of chromosomes
  integer,parameter::nl=1000    !number of marker
  integer,parameter::nmale=20 !number of male
  integer,parameter::nfemale=100 !number of male
  integer,dimension(nmale,nc,2,nl)::snpmale
  integer,dimension(nfemale,nc,2,nl)::snpfemale
! genetic structure of male and female population

  integer number_mutation,male_mutation,female_mutation
  integer imale,inc,inl,ia ! counters
  integer jj              ! counters

  integer,dimension(1):: seed
  real r,temp
  integer code1

  external normal_distribution02

  call random_seed(put=seed)
  call normal_distribution02

  temp=float(nmale)/(float(nmale)+float(nfemale))
  temp=float(number_mutation)*temp
  male_mutation=int(temp)
  female_mutation=number_mutation-male_mutation

  do jj=1,male_mutation
    call random_number(r)
    imale=int(r*nmale+1)
    call random_number(r)
    inc=int(r*nc+1)
    call random_number(r)
    inl=int(r*nl+1)
    call random_number(r)
    ia=int(r*2+1)
    code1=snpmale(imale,inc,ia,inl)
    if(code1==1) then
      snpmale(imale,inc,ia,inl)=2
    else
      snpmale(imale,inc,ia,inl)=1
    end if
  end do

  end do

!====mutation for female population=====

  do jj=1,female_mutation
    call random_number(r)

```

```

        imale=int(r*nfemale+1)
        call random_number(r)
        inc=int(r*nc+1)
        call random_number(r)
        inl=int(r*nl+1)
        call random_number(r)
        ia=int(r*2+1)
        code1=snpfemale(imale,inc,ia,inl)
        if(code1==1) then
            snpfemale(imale,inc,ia,inl)=2
        else
            snpfemale(imale,inc,ia,inl)=1
        end if
!
    end do

    call random_seed(get=seed)

```

```

end subroutine snp_m02

```

```

##snp_main.for

```

```

program snp_main

```

```

implicit none

```

```

common /comseed/seed

```

```

common /popmale/snpmale
common /popfemale/snpfemale
common /popmaa/snpmaa
common /popfaa/snpfaa

```

```

!this is for experiment under conservation
!main block connected with calculation subroutine

```

```

common/result1/ ngho,ngao1
common/resultdiv2/nghe,ngao2,ngae,ngpp,ngnp
common/resultdiv21/ngrare1,ngrare2
!connected with snp_diversity subroutine

```

```

common /rncdiver01/ncae !ncdiver block
common/rncdiver02/ncao
common/rncdiver03/nche
common/rncdiver04/ncnp
common/rncdiver05/ncpp
common/rncdiver06/ncrare1
common/rncdiver07/ncrare2 !ncdiver block

```

```

common/rsnp_ana01/k1,k2,k3,k4,k5,k6,k7,k8,k9,k10,ko,kf
!connected with snp_ana subroutine

```

```

common/resultcount01/gho01,gao01 !snp_count block
common/resultcount02/ncho01
common/resultcount03/ncao01

```

```

common/resultibd01/ngibd,ngibs !snp_ibd block
common/resultibd02/ncibd
common/resultibd03/ncibs !snp_ibd block

```

```

common/resultaa01/fmaa !aa_ana block
common/resultaa02/ffaa !aa_ana block

```

```
integer,parameter::gi=50 ! number of mgeneration
integer,parameter::rep=1 ! number of replication
```

```
integer,parameter::nc=19 !number of chromosomes
integer,parameter::nl=1000 !number of marker
integer,parameter::nmale=20 !number of male
integer,parameter::nfemale=100 !number of female
```

```
integer,dimension(nmale,nc,2,nl)::snpmale
integer,dimension(nfemale,nc,2,nl)::snpfemale
! genetic snp-code of male and female population
```

```
integer,dimension(nmale,nc,2,nl)::snpmma
integer,dimension(nfemale,nc,2,nl)::snpfma
! ancestor code for base population
```

```
real nghe,nghe,ngao1,ngao2,ngae,ngpp,ngnp
integer ngrare1,ngrare2
```

```
real,dimension(nc)::ncae,ncao,nche,ncnp,ncpp
real,dimension(nc)::ncrare1,ncrare2
integer k1,k2,k3,k4,k5
integer k6,k7,k8,k9,k10
integer ko,kf
```

```
real gho01,gao01
real,dimension(nc)::ncho01,ncao01
```

```
real,dimension(nmale)::fmaa ! aa_ana block
real,dimension(nfemale)::ffaa
```

```
real ngibd,ngibs,ibsbase !ibd block
real,dimension(nc):: ncibd,ncibs,ncibsbase
```

```
integer,dimension(1):: seed
integer count
```

```
integer t ! t=counter of generation
integer i,ii,iii
integer jj,j1,j2,code
```

```
integer,dimension(nc,2,nl)::inmaa
integer,dimension(nl,2)::ncmaa
real temp,temp1,temp2
```

```
external snp_input
external snp_marker
external snp_m02
external snp_r02
external snp_ibd
external aa_ana
```

```
external snp_diversity
external snp_calculaiion
external snp_ana
external snp_count
external snp_ncdive
```

```
!+++++
call system_clock(count)
seed=count
```

```

call snp_input
!+++++
  call snp_calculation
  call snp_diversity
  call snp_ana
  call snp_ncdiv
  call snp_count

open(11,file='c:\dataresult\hobase01.txt')
write(11,101) ngho,ngao1
  ibsbase=ngho
open(12,file='c:\dataresult\diverbase02.txt')
write(12,102) nghe,ngao2,ngae,ngpp,ngnp
write(12,103) ngrare1,ngrare2

open(14,file='c:\dataresult\diverbase03.txt')
  write(14,104) k1,k2,k3,k4,k5,k6,k7,k8,k9,k10,ko,kf
open(15,file='c:\dataresult\diverbase05.txt')
write(15,105) (ncae(ii),ii=1,nc)
write(15,*)
write(15,105) (ncao(ii),ii=1,nc)
write(15,*)
write(15,105) (nche(ii),ii=1,nc)
write(15,*)
write(15,105) (ncnp(ii),ii=1,nc)
write(15,*)
write(15,105) (ncpp(ii),ii=1,nc)
write(15,*)
write(15,105) (ncrare1(ii),ii=1,nc)
write(15,*)
write(15,105) (ncrare2(ii),ii=1,nc)
write(15,*)
write(15,105) (ncho01(ii),ii=1,nc)
write(15,*)
write(15,105) (ncao01(ii),ii=1,nc)

close(11);close(12);close(13);close(14);close(15)

open(16,file='c:\dataresult\maa001.txt')
open(17,file='c:\dataresult\faa001.txt')
open(51,file='c:\dataresult\51.txt')
open(52,file='c:\dataresult\52.txt')
open(53,file='c:\dataresult\53.txt')

call aa_mark
call aa_ana
  write (16,106) (fmaa(ii),ii=1,nmale)
  write (17,107) (ffaa(ii),ii=1,nfemale)
close(16);close(17)
call snp_ibd
  ngibs=1-(ngibs/ibsbase)
  write (51,101) ngibd,ngibs
  write (52,105) (ncibd(ii),ii=1,nc)
  write (53,105) (ncibs(ii),ii=1,nc)
  ncibsbase=ncibs
close(51);close(52);close(53)

!===== the block above is basepopulation =====
open(21,file='c:\dataresult\01.txt')
open(22,file='c:\dataresult\02.txt')
open(23,file='c:\dataresult\03.txt')
open(24,file='c:\dataresult\04.txt')

```

```

open(25,file='c:\dataresult\05.txt')
open(26,file='c:\dataresult\06.txt')
open(27,file='c:\dataresult\07.txt')
open(28,file='c:\dataresult\08.txt')
open(29,file='c:\dataresult\09.txt')

open(30,file='c:\dataresult\10.txt')
open(31,file='c:\dataresult\11.txt')
open(32,file='c:\dataresult\12.txt')
open(33,file='c:\dataresult\13.txt')
open(34,file='c:\dataresult\14.txt')
open(35,file='c:\dataresult\15.txt')
open(36,file='c:\dataresult\16.txt')

open(40,file='c:\dataresult\40.txt')
open(41,file='c:\dataresult\41.txt')
open(42,file='c:\dataresult\42.txt')

open(50,file='c:\dataresult\50.txt')

do i=1,rep

  print*,i

  call snp_input
  call aa_mark

do t=1,gi

  call snp_m02
  call snp_r02

  call snp_calculation
  write(21,101) ngho,ngao1

  call snp_diversity
  write(22,102) nghe,ngao2,ngae,ngpp,ngnp
  write(29,103) ngrare1,ngrare2
  call snp_ibd
  ngibs=1-(ngibs/ibsbases)
  write (23,101) ngibd,ngibs
  do ii=1,nc
    temp1=ncibsbases(ii)
    temp2=ncibs(ii)
    temp=1-(temp2/temp1)
    ncibs(ii)=temp
  end do
  write (24,105) (ncibd(ii),ii=1,nc)
  write (25,105) (ncibs(ii),ii=1,nc)

  call aa_ana

  write (26,106) (fmaa(ii),ii=1,nmale)
  write (27,107) (ffaa(ii),ii=1,nfemale)

  call snp_ana
  write(28,104) k1,k2,k3,k4,k5,k6,k7,k8,k9,k10,ko,kf

  call snp_ncdiv
  write(30,105) (ncae(ii),ii=1,nc)
  write(31,105) (ncao(ii),ii=1,nc)
  write(32,105) (nche(ii),ii=1,nc)

```

```
write(33,105) (ncnp(ii),ii=1,nc)
write(34,105) (ncpp(ii),ii=1,nc)
write(35,105) (ncrare1(ii),ii=1,nc)
write(36,105) (ncrare2(ii),ii=1,nc)
```

```
call snp_count
```

```
write(40,101) gho01,gao01
write(41,105) (ncho01(ii),ii=1,nc)
write(42,105) (ncao01(ii),ii=1,nc)
```

```
end do ! end of 1-t generation
```

```
!-----
```

```
do iii=1,nc
do ii=1,2
do jj=1,nl
code=snpmaa(1,iii,ii,jj)
inmaa(iii,ii,jj)=code
ncmaa(jj,ii)=code
end do
end do
write(50,501) ((ncmaa(j1,j2),j2=1,2),j1=1,nl)
write(50,*)
end do
```

```
!-----
```

```
write(21,*)
write(22,*)
write(23,*)
write(24,*)
write(25,*)
write(26,*)
write(27,*)
write(28,*)
write(30,*)
write(31,*)
write(32,*)
write(33,*)
write(34,*)
write(35,*)
write(36,*)
write(40,*)
write(41,*)
write(42,*)
```

```
end do ! end of 1-n replication
```

```
!-----
```

```
close(21);close(22);close(23);close(24);close(25)
close(26);close(27);close(28);close(29)
close(30)
close(31);close(32);close(33);close(34);close(35);close(36)
close(40);close(41);close(42)
close(50)
```

```
101 format(2f10.4)
102 format(5f15.4)
103 format(2i10)
104 format(12i10)
105 format(19f10.4)
106 format(20f10.4)
107 format(100f10.4)
108 format(6f10.4)
501 format(2i5)
```

end ! program of the main block

```
##snp_ncdiv.for
subroutine snp_ncdiv

implicit none

common /resultaa/aa

common /rncdiver01/ncae
common/rncdiver02/ncao
common/rncdiver03/nche
common/rncdiver04/ncnp
common/rncdiver05/ncpp
common/rncdiver06/ncrare1
common/rncdiver07/ncrare2

integer,parameter::nc=19      !number of chromosomes
integer,parameter::nl=1000    !number of marker

real,dimension(nc,nl,2)::aa
real,dimension(2)::freq_allele

real,dimension(nc)::ncae,ncao,nche,ncnp,ncpp
real,dimension(nc)::ncrare1,ncrare2

integer ii,i,j

integer ncnun
integer temprare1,temprare2

real temp ! frequency of snp
real tempae,temphe,temppp
real lociae
integer tempnp

!----- the start of calculation -----

do ii=1,nc
  ncnun=0
  tempae=0;temphe=0;temppp=0;tempnp=0
  temprare1=0;temprare2=0

  do i=1,nl

    lociae=0

    do j=1,2
      freq_allele(j)=aa(ii,i,j)
      temp=freq_allele(j)

      lociae=lociae+temp*temp ! effective allelic rich

      if(temp>=0.001) then
        ncnun=ncnun+1      ! allelic number
      end if

      if(0.001<=temp.and.temp<0.02) then
        temprare1=temprare1+1 ! rare allele
      end if
    end do
  end do
end do
```

```

end if

if(0.001<=temp.and.temp<0.05) then
  temprare2=temprare2+1
end if
end do ! end of a locus

temphe=temphe+(1-lociae)
tempae=tempae+1.0/lociae

if (ncnum>1) then
  tempnp=tempnp+1
end if

end do ! end of cycle snp loci in a given chromosome

ncao(ii)=float(ncnum)/float(nl) !ncnum is gonomic allelic number
nche(ii)=temphe/float(nl) !temphe is gonomic he
ncae(ii)=tempae/float(nl) !tempae is gonomic ae
ncpp(ii)=float(tempnp)/float(nl) !tempp is gonomic pp
ncnp(ii)=float(tempnp) !num_p is gonomic np
ncrare1(ii)=float(temprare1)
ncrare2(ii)=float(temprare2)
end do

```

```
end subroutine snp_ncdiv
```

```
##snp_output02.for
```

```
subroutine snp_output
```

```
implicit none
```

```
common /popmaa/snpmaa
```

```
integer,parameter::nc=19 !number of chromosomes
```

```
integer,parameter::nl=1000 !number of marker
```

```
integer,parameter::nmale=20 !number of male
```

```
integer,dimension(nmale,nc,2,nl)::snpmaa
```

```
integer code
```

```
integer i,ii,iii
```

```
integer j,jj,jjj
```

```
do iii=1,nc
```

```
do ii=1,nl
```

```
do i=1,2
```

```
do j=1,nmale
```

```
code=snpmaa(j,iii,i,ii)
```

```
snpmnl(iii,ii,i,j)=code
```

```
end do
```

```
end do
```

```
end do
```

```
end do
```

```
do iii=1,nc
```

```
do ii=1,nl
```



```

do i=1,2
do j=1,nmale
code=snpmnl(iii,ii,i,j)
ncmsnp(i,j)=code
end do
end do
write(30,300) ((ncmsnp(jjj,jj),jj=1,nmale),jjj=1,2)
end do

end do

close(30)

```

```

!#####

```

```

300 format(1x,20i4)
305 format(1x,100i4)

```

```

end subroutine snp_output

```

```

##snp_R02.for

```

```

subroutine snp_R02

```

```

! this is reproduction subroutine, equal family random mating policy

```

```

implicit none

```

```

common /comseed/seed

```

```

common /popmale/snpmale
common /popfemale/snpfemale
common /popmaa/snpmaa
common /popfaa/snpfaa

```

```

common/cross/crossover !connected with poisson block

```

```

common /femalerandom/female_num
common /malerandom/male_num ! connected with random_mating 2011

```

```

integer,parameter::nc=19      !number of chromosomes
integer,parameter::nl=1000    !number of marker
integer,parameter::nmale=20   !number of male
integer,parameter::nfemale=100 !number of female

```

```

integer,parameter::matingratio=5

```

```

integer,dimension(nmale,nc,2,nl)::snpmale,new_male
integer,dimension(nfemale,nc,2,nl)::snpfemale,new_female

```

```

integer,dimension(nmale,nc,2,nl)::snpmaa,new_maa
integer,dimension(nfemale,nc,2,nl)::snpfaa,new_faa

```

```

integer,dimension(nc,nl)::gmale,gfemale !gamete of individuals
integer,dimension(nc,nl)::gmcod,gfcod

```

```

integer,dimension(nl)::gg1,gg2,gtemp1,gtemp2

```

```

integer,dimension(nl)::gcod1,gcod2
integer,dimension(nl)::gctemp1,gctemp2

! temporal gametes based on chromosomes
integer,dimension(nc)::crossover ! numbers of crossover per chromosome
integer icross,num_cross !number or site of crossover
integer kk ! counter for crossover

integer,dimension(nc,2,nl)::snpm1
integer,dimension(nc,2,nl)::snpf1
! genetic snp-code of the parent-offspring generations

integer,dimension(nc,2,nl)::codm1
integer,dimension(nc,2,nl)::codf1

integer,dimension(nfemale)::female_num
integer,dimension(nmale)::male_num

integer,dimension(1):: seed
real r

integer i,ii,j,jj,jjj
integer imale,ifemale
integer k,num
integer i1,i2

external poisson_process
external random_mating2011

call random_seed(put=seed)

! *****
! to produce the next_generation male population
! open(20,file='f:\dataresult\snpmgamete20.txt')
! open(21,file='f:\dataresult\snpmgamete21.txt')

call random_mating2011

do i=1,nmale ! choice of male and female by chance

imale=male_num(i)

call random_number(r)
num=int(r*matingratio+1)
i1=num+(i-1)*matingratio
ifemale=female_num(i1)

do j=1,nc
do jj=1,2
do jjj=1,nl
snpm1(j,jj,jjj)=snpmale(imale,j,jj,jjj)
snpf1(j,jj,jjj)=snpfemale(ifemale,j,jj,jjj)

codm1(j,jj,jjj)=snpmaa(imale,j,jj,jjj)
codf1(j,jj,jjj)=snpfaa(ifemale,j,jj,jjj)

end do
end do
end do

! write(20,201) imale
! write(21,201) imale

```









```

end do
call poisson_process
  num_cross=crossover(j)
  if(num_cross>=1) then
  do kk=1,num_cross
    do jjj=1,nl
      gtemp1(jjj)=gg1(jjj)
      gtemp2(jjj)=gg2(jjj)

      gctemp1(jjj)=gcod1(jjj)
      gctemp2(jjj)=gcod2(jjj)

    end do
    call random_number(r)
    icross=int(r*nl)
    do jjj=1,nl
      if(jjj<icross) then
        gg1(jjj)=gtemp1(jjj)
        gg2(jjj)=gtemp2(jjj)

        gcod1(jjj)=gctemp1(jjj)
        gcod2(jjj)=gctemp2(jjj)
      else
        gg1(jjj)=gtemp2(jjj)
        gg2(jjj)=gtemp1(jjj)

        gcod1(jjj)=gctemp2(jjj)
        gcod2(jjj)=gctemp1(jjj)

      end if
    end do
  end do ! end of crossover
end if

  call random_number(r)
  num=int(r*1000)
  k=mod(num,2)
  if(k==0)then
  do jjj=1,nl
    gfemale(j,jjj)=gg1(jjj)

    gfcod(j,jjj)=gcod1(jjj)
  end do
  else
  do jjj=1,nl
    gfemale(j,jjj)=gg2(jjj)
    gfcod(j,jjj)=gcod2(jjj)

  end do
  end if
end do ! end of nc for female gametes

! production of next generation of femalepop
do j=1,nc
do jjj=1,nl
  new_female(i2,j,1,jjj)=gfemale(j,jjj)
  new_female(i2,j,2,jjj)=gmale(j,jjj)

  new_faa(i2,j,1,jjj)=gfcod(j,jjj)
  new_faa(i2,j,2,jjj)=gmcod(j,jjj)

end do

```

```

        end do
    end do ! the end of mating_ratio
    end do ! the end to produce the next_generation male population
    call random_seed(get=seed)

    snpmale=new_male
    snpfemale=new_female

    snpmaa=new_maa
    snpfaa=new_faa

! open(22,file='f:\dataresult\snpmapmale.txt')
!
!
!   do i=1,nmale
!
!       write(22,200) i
!
!
!   do j=1,nc
!       do jj=1,2
!           do jjj=1,nl
!               snpm1(j,jj,jjj)=snpmale(i,j,jj,jjj)
!               gmale(jj,jjj)=snpmale(i,j,jj,jjj)
!           end do
!       end do
!       write(22,200) ((gmale(j,jjj),jjj=1,nl),j=1,2)
!   end do
! end do
! close(22)

200 format(1x,100i1)
201 format(1x,i3)

end subroutine snp_R02

```
